# Supplementary material for: Single-domain antibody delivery using an mRNA platform protects against lethal doses of botulinum neurotoxin A
Source: PubMed Central journal article supplement (PMC9971915; doi:10.3389/fimmu.2023.1098302), 2023-02-14
Supplement: Image_1.pdf [file Image_1.pdf]

## SUPPLEMENTARY MATERIAL

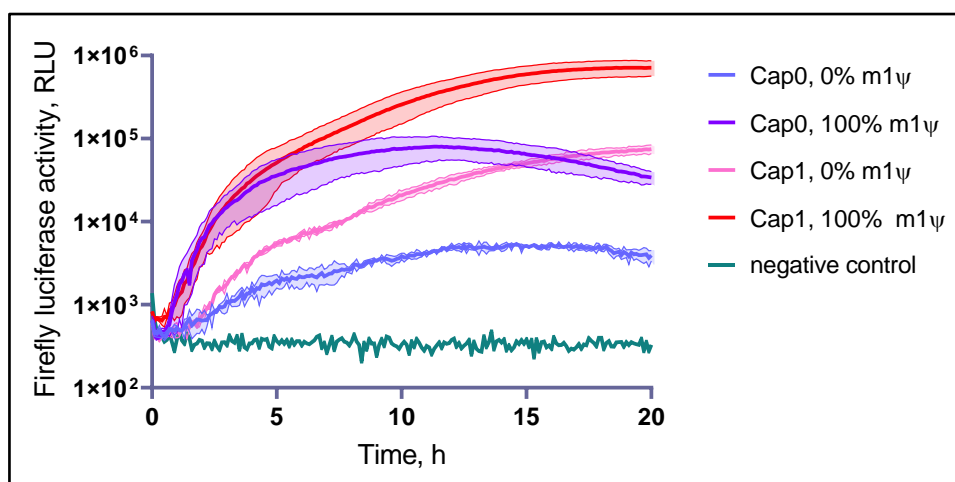

**Figure S1.** The influence of the presence of a cap1/cap0 structure and incorporation of modified nucleoside, N1-methylpseudouridine (m<sup>1</sup>Ψ), on the firefly luciferase mRNA expression in mouse bone marrow-derived dendritic cells (mBMDC).
