# Supplementary material for: Single-domain antibody delivery using an mRNA platform protects against lethal doses of botulinum neurotoxin A
Source: PubMed Central journal article supplement (PMC9971915; doi:10.3389/fimmu.2023.1098302), 2023-02-14
Supplement: Image_2.pdf [file Image_2.pdf]

SUPPLEMENTARY MATERIAL

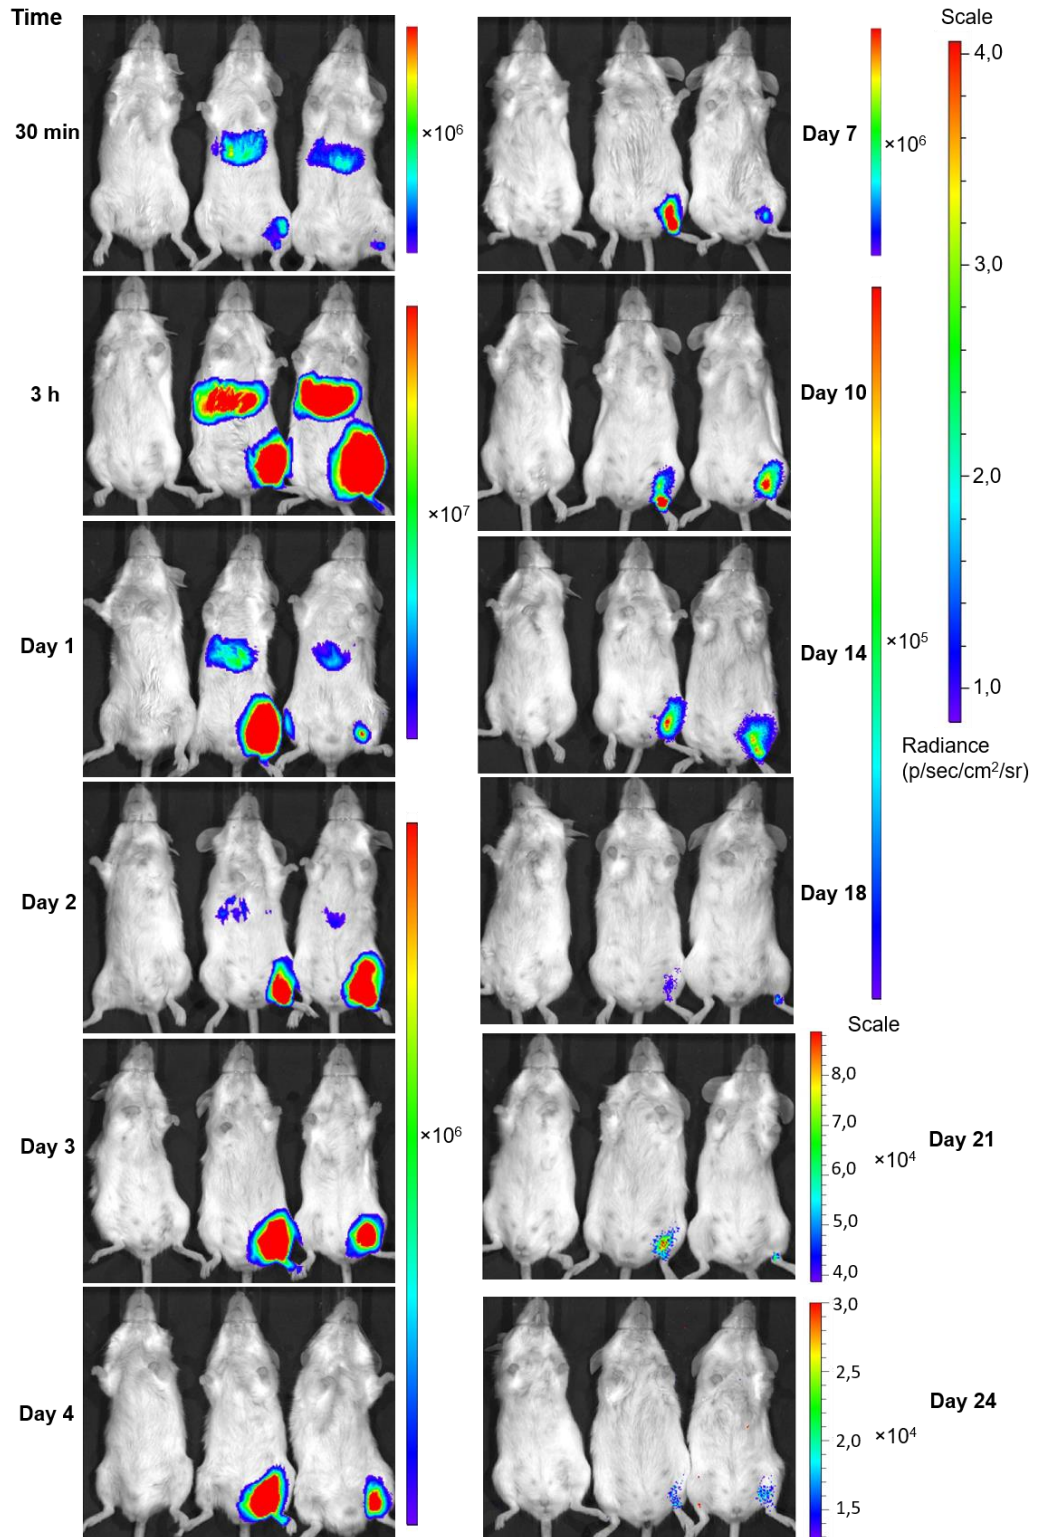

**Figure S2. Representative IVIS images of BALB/c mice injected with 5.0  $\mu$ g mRNA-LNP in PBS (right and middle mouse), or PBS (left mouse) by intramuscular (i.m.) route. Relative luminescence plot is shown, and the scale of luminescence is indicated.**
